# Supplementary material for: Do proton pump inhibitors influence SARS-CoV-2 related outcomes? A meta-analysis
Source: HighWire-hosted journal article supplement (doi:10.1136/gutjnl-2020-323366), 2020-11-10
Supplement: gutjnl-2020-323366supp001_data_supplement.pdf [file gutjnl-2020-323366supp001_data_supplement.pdf]

**Supplementary figure 1: Flow chart for study selection**

\*Searches using strategy#1 ("proton pump inhibitor\*" or "PPI\*" OR " H2-receptor antagonist\*" OR hypochlorhydria OR "gastric acid" OR "gastric pH" OR omeprazole OR rabeprazole OR esomeprazole OR famotidine OR pantoprazole OR lansoprazole) or strategy#2 (gastrointestinal[title/abstract]) were performed in the COVID-19 Research Articles Downloadable Database by the US CDC (<https://www.cdc.gov/library/researchguides/2019novelcoronavirus/researcharticles.html>), which includes literature from 25 databases, such as Medline (Ovid and PubMed), Embase, Scopus, Cochrane Library, LitCovid, WHO COVID-19 website, medRxiv (preprints), bioRxiv (preprints), chemRxiv (preprints), and SSRN (preprints).

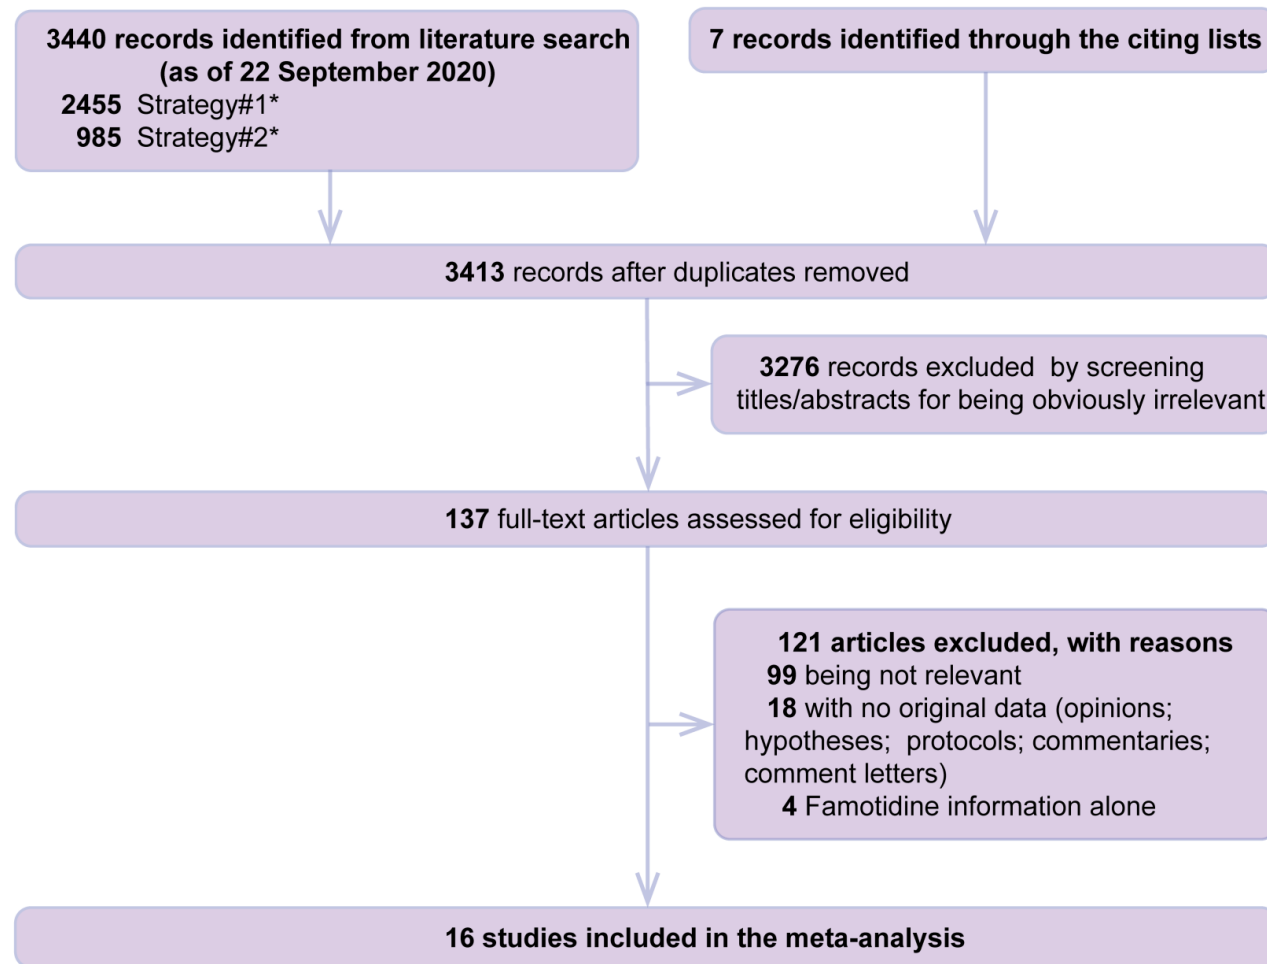

Supplementary figure 1

### Supplementary figure 2: Subgroup analysis of Korean versus non-Korean cohorts for the association between PPI use and risk of SARS-CoV-2 infection

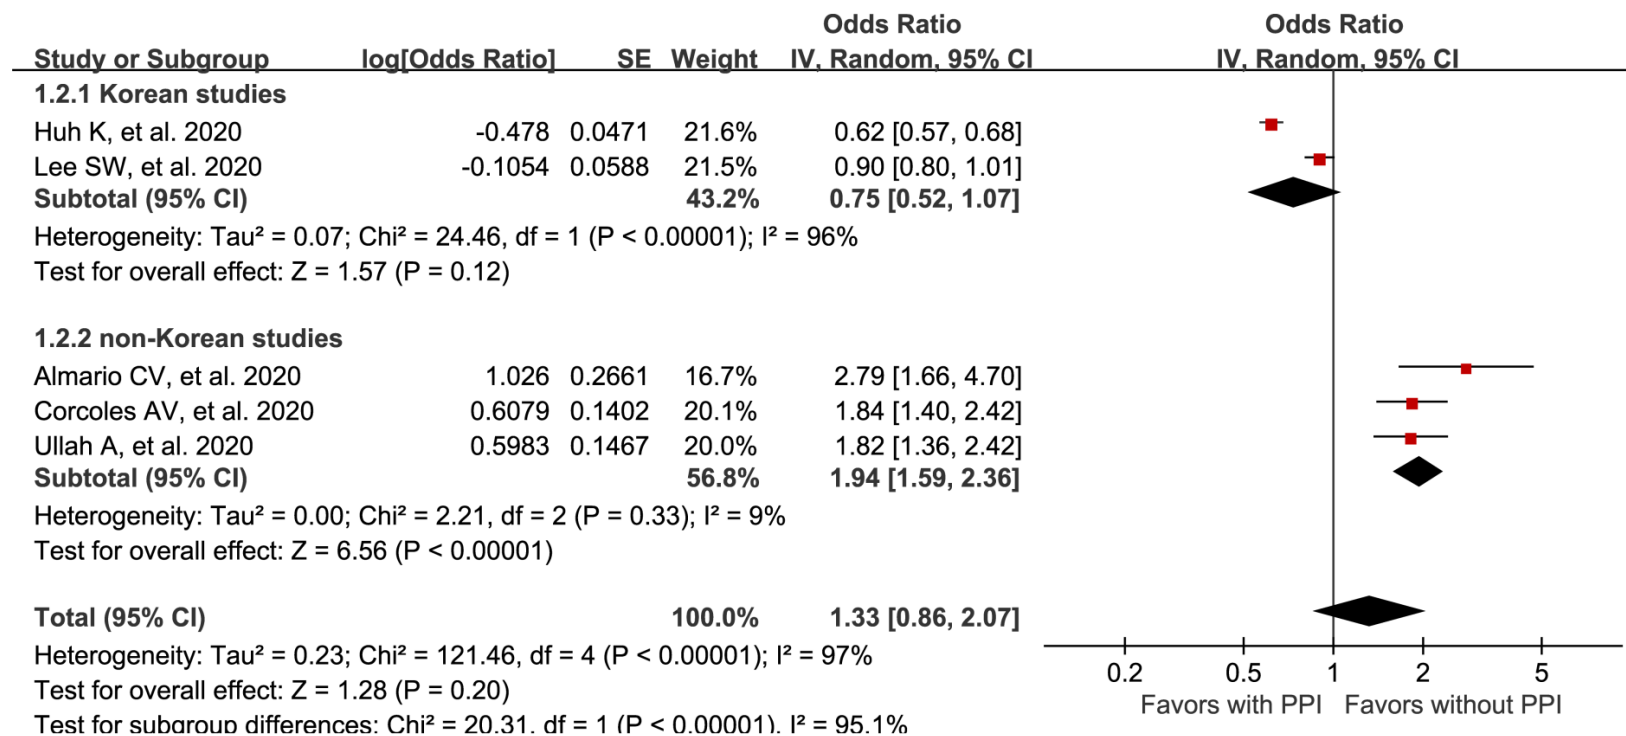

### Supplementary figure 3: Forest plot showing leave-one-out sensitivity analysis for the association of PPI use with incidence of SARS-CoV-2 infection

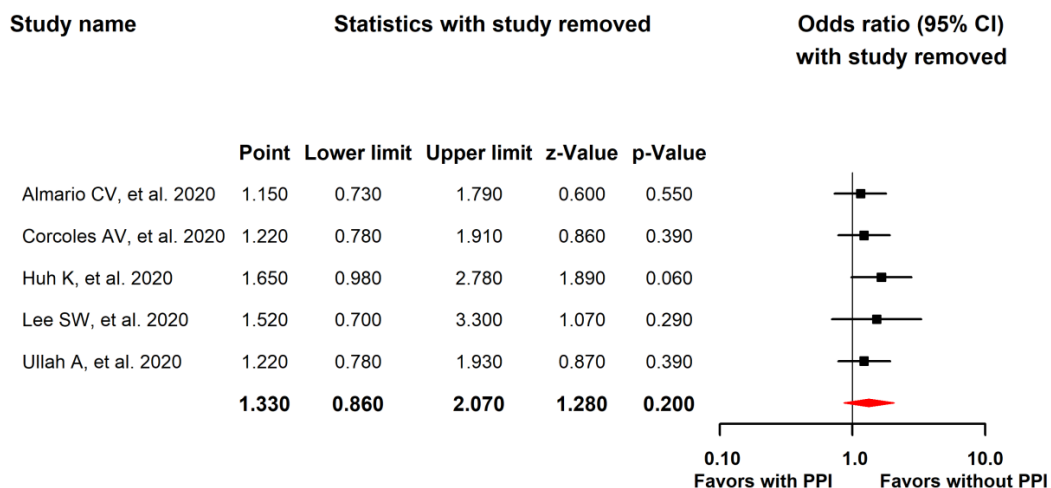

### Supplementary figure 4: Forest plot showing leave-one-out sensitivity analysis for the association of PPI use with severe outcomes of COVID-19

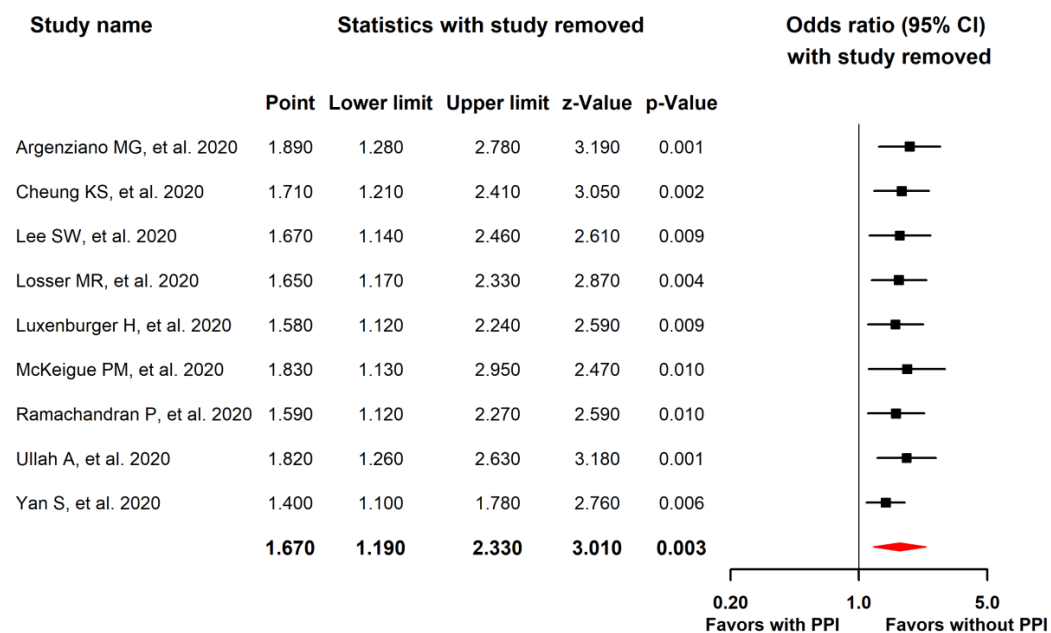

**Supplementary table: Summary characteristics of the included studies**

| Study                          | Study design             | Country or region | Timing of data collection | Mean or median age (years) | Male subjects (%) | Number of subjects | Number of PPI users | Clinical outcome                                           | Confounder adjustment |
|--------------------------------|--------------------------|-------------------|---------------------------|----------------------------|-------------------|--------------------|---------------------|------------------------------------------------------------|-----------------------|
| Lee 2020 <sup>1</sup>          | Retrospective cohort     | Korea             | Jan 1 to May 15, 2020     | 48                         | 51.0              | 132316             | 20405               | SARS-CoV-2 infection; severe outcomes of COVID-19*         | Yes                   |
| Almario 2020 <sup>2</sup>      | Retrospective cohort     | USA               | May 3 to Jun 24, 2020     | NR                         | 48                | 53130              | 16547               | SARS-CoV-2 infection                                       | Yes                   |
| Ullah 2020 <sup>3</sup>        | Retrospective cohort     | UK                | Feb 12 to Jun 12, 2020    | 57                         | 43.9              | 15586              | 5908                | SARS-CoV-2 infection; severe outcomes of COVID-19*         | No                    |
| Corcoles 2020 <sup>4</sup>     | Retrospective cohort     | Spain             | May 1 to Apr 3, 2020      | ≥ 50                       | 48.1              | 34936              | 11807               | SARS-CoV-2 infection                                       | No                    |
| Huh 2020 <sup>5</sup>          | Case-control             | Korea             | Up to Apr 8, 2020         | 49                         | 48.7              | 65149              | 14167               | SARS-CoV-2 infection                                       | Yes                   |
| Tarlow 2020 <sup>6</sup>       | Retrospective cohort     | USA               | NR                        | NR                         | NR                | 84325              | 18240               | SARS-CoV-2 infection                                       | No                    |
| Ramachandran 2020 <sup>7</sup> | Retrospective cohort     | USA               | Mar 1 to Apr 25, 2020     | 66                         | 54.9              | 295                | 46                  | Severe outcomes of COVID-19*;<br>duration of hospital stay | Yes                   |
| Luxenburger 2020 <sup>8</sup>  | Retrospective cohort     | Germany           | NR                        | 65                         | 56.6              | 152                | 62                  | Severe outcomes of COVID-19*                               | No                    |
| McKeigue 2020 <sup>9</sup>     | Case-control             | Scotland          | Up to Jun 6, 2020         | NR                         | NR                | 41220              | 2715                | Severe outcomes of COVID-19*                               | No                    |
| Argenziano 2020 <sup>10</sup>  | Retrospective cohort     | USA               | Mar 1 to Apr 5, 2020      | 63                         | 59.6              | 1000               | 163                 | Severe outcomes of COVID-19*                               | No                    |
| Cheung 2020 <sup>11</sup>      | Retrospective cohort     | Hongkong          | Jan 1 to May 10, 2020     | NR                         | NR                | 952                | 27                  | Severe outcomes of COVID-19*                               | Yes                   |
| Losser 2020 <sup>12</sup>      | Case series (individual) | France            | Mar 16 to Apr 12, 2020    | 70                         | 58.8              | 17                 | 6                   | Severe outcomes of COVID-19*                               | No                    |
| Yan 2020 <sup>13</sup>         | Retrospective cohort     | China             | Jan 22 to Mar 13, 2020    | 51                         | 48.2              | 168                | 32                  | Severe outcomes of COVID-19*                               | No                    |
| Zhang 2020 <sup>14</sup>       | Retrospective cohort     | China             | Jan 20 to Mar 16, 2020    | 50                         | 55.2              | 58                 | 29                  | Duration of hospital stay                                  | Yes                   |

---

|                              |                      |        |                        |    |    |      |     |                              |     |
|------------------------------|----------------------|--------|------------------------|----|----|------|-----|------------------------------|-----|
| Jimenez 2020 <sup>15</sup>   | Retrospective cohort | Brazil | NR                     | NR | NR | 1357 | 242 | Severe outcomes of COVID-19* | Yes |
| Freedberg 2020 <sup>16</sup> | Retrospective cohort | USA    | Feb 25 to Apr 13, 2020 | NR | NR | 1620 | NR  | Severe outcomes of COVID-19* | Yes |

---

\*Severe outcomes of COVID-19 consisted of admission to the intensive care unit, mechanical ventilation, acute respiratory distress syndrome, or death.

COVID-19, Coronavirus Disease 2019; NR, not reported; PPI, proton pump inhibitor; SARS-CoV- 2, severe acute respiratory syndrome coronavirus 2.
